# Supplementary material for: Cannabis exposure as an interactive cardiovascular risk factor and accelerant of organismal ageing: a longitudinal study
Source: PubMed Central journal article supplement — BMJ Open. 2016 Nov 7;6(11):e011891. doi: 10.1136/bmjopen-2016-011891 (PMC5129004; doi:10.1136/bmjopen-2016-011891), 2016-11-07

**SUPPLEMENTARY MATERIAL**

## **Statistical Appendix – Treatment of Buprenorphine**

It may be of assistance to the reader to consider the treatment of buprenorphine in the present study in some further detail.

Supplementary Figure 1 shows the comparison of buprenorphine and cannabis to the control group, with all controls considered as a single group conflating tobacco smokers and non-smokers together.

Supplementary Figure 2 does the same exercise but now separating out the two groups.

Supplementary Figure 3 compares the four inhalational using groups to buprenorphine.

From these figures it is clear that the quantitative effect of buprenorphine to apparently accelerate the RA/CA ratio and therefore the rate of cardiovascular aging is quantitatively small.

Supplementary Figure 4 is a similar figure, but also includes methadone for comparison, whose cardiovascular toxicity has been described in a previous report <sup>1</sup>.

One way to do this is by including it as a variable independent of cannabis and then by comparing all the groups to non-smoking controls. This was done first as a cross-sectional linear regression regressing the RA/CA ratio against interactions between CA, BMI and drug category. In this regard a model cubic in age was shown to be the optimal model (RSS linear model 131.84, cubic 126.51,  $F=2.163$ ,  $DF=22$ ,  $P=0.0014$ ). In this model, shown in Supplementary Table 1, interactive terms with the square and cube of CA, BMJI and cannabis use. Terms including buprenorphine then were not significant.

A similar exercise was performed for the longitudinal dataset. In this exercise the RA/CA ratio was regressed in a mixed effects model against the CA, time, BMI and drug category. On this occasion the linear model (Supplementary Table 2) was significantly better than the cubic model, but the linear model accounted for more of the AIC but not significantly so than a model quadratic in CA (AIC = 1071.19, 1061.25,  $DF=27$  and  $24$ ,  $L.Ratio=3.93$ ,  $P=0.2682$ ). The result of the quadratic model is shown in Supplementary Table 3.

The effects of cannabis and buprenorphine were next considered as continuous variables. When the RA/CA ratio was regressed against CA, cannabis duration and cannabis use in a cross-sectional model, the interaction of all three was highly significant ( $P=0.0042$ , Supplementary Table 4).

When the same exercise was repeated over time in the longitudinal dataset in a mixed effects model again terms in cannabis duration and buprenorphine dose were significant, from  $P=0.0057$ , Supplementary Table 5).

No data on the duration for which buprenorphine had been used was available. In clinical practice the use of buprenorphine by many patients is highly variable, with periods of use and periods of non-use commonplace.

Hence in summary it may be said that both buprenorphine and cannabis have an effect on cardiovascular aging but the effect of buprenorphine appears to be small, whilst the effect of

cannabis appears to be quantitatively much larger. In considering the results of the regression studies, the size of the study groups must be borne in mind. The size of the buprenorphine group in the longitudinal study is 1109 and the size of the cannabis groups in this study is 31. To some extent this difference in study group size explains the statistical results described.

### **References**

1. Reece A.S., Hulse G.K. Impact of Opioid Pharmacotherapy on Arterial stiffness and Vascular Ageing: Cross-sectional and Longitudinal Studies. *Cardiovascular Toxicology* 2013;13:254-66.

**Supplementary Table 1 – Linear Regression of VA/CA**

| Parameter                          | Parameter Values |            |        |         | Model Values |      |          |         |     |
|------------------------------------|------------------|------------|--------|---------|--------------|------|----------|---------|-----|
|                                    | Estimate         | Std. Error | t      | P       | Adj. R Squ.  | F    | DF       | P       |     |
| (Age) <sup>2</sup> : BMI           | -0.2350          | 0.0503     | -4.669 | <0.0001 | 0.424        | 2.61 | 32, 1130 | <0.0001 | *** |
| (Age) <sup>3</sup> : BMI           | -0.1262          | 0.0384     | -3.282 | 0.0011  |              |      |          |         | **  |
| (Age) <sup>2</sup> : BMI: Cannabis | 144.2000         | 46.2700    | 3.117  | 0.0019  |              |      |          |         | **  |
| Age: Cannabis                      | 184.5000         | 69.8700    | 2.641  | 0.0084  |              |      |          |         | **  |
| (Age) <sup>2</sup> : Cannabis      | -222.4000        | 87.2900    | -2.548 | 0.0110  |              |      |          |         | *   |
| (Age) <sup>3</sup> : Cannabis      | 50.8700          | 20.5700    | 2.473  | 0.0136  |              |      |          |         | *   |
| BMI: Cannabis                      | -38.4900         | 16.2700    | -2.366 | 0.0181  |              |      |          |         | *   |
| BMI                                | 0.2307           | 0.1008     | 2.289  | 0.0223  |              |      |          |         | *   |

**Supplementary Table 2.: –Linear Regression of VA/CA**

**Final Model Linear in Chronologic Age**

| Parameter Values         |         |           |     |         |         | Model   |          |           |
|--------------------------|---------|-----------|-----|---------|---------|---------|----------|-----------|
| Statistical Measure      | Value   | Std.Error | DF  | t-value | P       | AIC     | BIC      | Log.Lik   |
| Age: BMI                 | -0.0722 | 0.0157    | 716 | -4.6071 | <0.0001 | 1196.08 | 1346.524 | -571.0399 |
| BMI                      | 0.4888  | 0.1219    | 716 | 4.0112  | 0.0001  |         |          |           |
| Days: None               | -0.1333 | 0.0456    | 716 | -2.9241 | 0.0036  |         |          |           |
| Age: Days: None          | 0.0353  | 0.0122    | 716 | 2.8934  | 0.0039  |         |          |           |
| Age: BMI: Tobacco        | 0.1127  | 0.0394    | 716 | 2.8646  | 0.0043  |         |          |           |
| BMI: Both                | -1.4492 | 0.5312    | 716 | -2.7284 | 0.0065  |         |          |           |
| Both                     | 3.5170  | 1.3237    | 716 | 2.6570  | 0.0081  |         |          |           |
| Age: Days: Buprenorphine | 0.0291  | 0.0110    | 716 | 2.6518  | 0.0082  |         |          |           |
| Days: Buprenorphine      | -0.0965 | 0.0391    | 716 | -2.4668 | 0.0139  |         |          |           |
| BMI: Tobacco             | -0.6647 | 0.2975    | 716 | -2.2340 | 0.0258  |         |          |           |
| Age: BMI: Buprenorphine  | 0.0498  | 0.0241    | 716 | 2.0640  | 0.0394  |         |          |           |

**Supplementary Table 3 – Mixed Effects Linear Regression of VA/CA**

**Final (Optimum) Model Quadratic in Chronologic Age**

| Parameter Values                        |         |           |     |         |         | Model    |          |           |
|-----------------------------------------|---------|-----------|-----|---------|---------|----------|----------|-----------|
| Statistical Measure                     | Value   | Std.Error | DF  | t-value | P       | AIC      | BIC      | Log.Lik   |
| Age: BMI                                | -0.1397 | 0.0266    | 719 | -5.2511 | <0.0001 | 1174.824 | 1308.589 | -563.4121 |
| BMI                                     | 0.1928  | 0.0576    | 719 | 3.3492  | 0.0009  |          |          |           |
| Age: BMI: Cannabis                      | 0.1745  | 0.0675    | 719 | 2.5868  | 0.0099  |          |          |           |
| (Age) <sup>2</sup> : BMI: Buprenorphine | 0.1174  | 0.0482    | 719 | 2.4350  | 0.0151  |          |          |           |
| Age: BMI: Tobacco                       | 0.0788  | 0.0346    | 719 | 2.2767  | 0.0231  |          |          |           |
| (Age) <sup>2</sup> : Days               | 0.0466  | 0.0208    | 719 | 2.2347  | 0.0257  |          |          |           |
| (Age) <sup>2</sup> : BMI: Tobacco       | 0.1703  | 0.0768    | 719 | 2.2179  | 0.0269  |          |          |           |
| Age: Days: Buprenorphine                | 0.0265  | 0.0121    | 719 | 2.1886  | 0.0289  |          |          |           |
| Age: BMI: Buprenorphine                 | 0.0429  | 0.0205    | 719 | 2.0896  | 0.0370  |          |          |           |

**Supplementary Table 4 – Linear Regression of VA/CA**

**Linear Model, Continuous Variables**

| <b>Parameter</b>                                    | <b>Parameter Values</b> |                   |          |          | <b>Model Values</b> |          |           |          |
|-----------------------------------------------------|-------------------------|-------------------|----------|----------|---------------------|----------|-----------|----------|
|                                                     | <b>Estimate</b>         | <b>Std. Error</b> | <b>t</b> | <b>P</b> | <b>Adj. R Squ.</b>  | <b>F</b> | <b>DF</b> | <b>P</b> |
| Cannabis Use: Cannabis Duration: Buprenorphine Dose | 0.0137                  | 0.0036            | 3.807    | 0.0042   | 0.5744              | 14.49    | 1,9       | 0.0042   |

\*\*

**Supplementary Table 5 – Mixed Effects Linear Regression of VA/CA**

**Linear Model, Continuous Variables**

| Parameter Values                   |         |           |    |         |        | Model   |         |         |
|------------------------------------|---------|-----------|----|---------|--------|---------|---------|---------|
| Statistical Measure                | Value   | Std.Error | DF | t-value | P      | AIC     | BIC     | Log.Lik |
| Cannabis Years: Buprenorphine Dose | 0.0551  | 0.0169    | 14 | 3.2635  | 0.0057 | 23.7869 | 29.6771 | -6.8934 |
| Cannabis Years                     | -0.3700 | 0.1339    | 10 | -2.7638 | 0.0200 |         |         |         |



**Supplementary Table 6.: Clinical Laboratory Values**

| <b>Parameter</b>                  | <b>None (534)</b> | <b>Tobacco (506)</b> | <b>THC (11)</b> | <b>Both (112)</b> | <b>THC-None</b> | <b>THC-Tob</b> | <b>THC-Both</b> |
|-----------------------------------|-------------------|----------------------|-----------------|-------------------|-----------------|----------------|-----------------|
|                                   |                   |                      |                 |                   | P               | P              | P               |
| Haemoglobin (g/dl)                | 143.02 (1.13)     | 144.53 (0.87)        | 153.25 (7.19)   | 144.22 (1.69)     | 0.1117          | 0.2348         | 0.1999          |
| <i><b>Immune</b></i>              |                   |                      |                 |                   |                 |                |                 |
| WCC (x10 <sup>9</sup> /L)         | 7.21 (0.28)       | 8.25 (0.13)          | 9.05 (0.98)     | 8 (0.21)          | 0.2346          | 0.4734         | 0.2310          |
| Platelets (x10 <sup>9</sup> /L)   | 259.58 (5.75)     | 265.55 (3.87)        | 279.75 (33.35)  | 257.77 (8.09)     | 0.5305          | 0.6627         | 0.5129          |
| Neutrophils (x10 <sup>9</sup> /L) | 4.2 (0.24)        | 4.85 (0.12)          | 5.675 (0.96)    | 4.609375 (0.18)   | 0.2697          | 0.4198         | 0.1662          |
| Lymphocytes (x10 <sup>9</sup> /L) | 2.21 (0.07)       | 2.54 (0.05)          | 2.575 (0.41)    | 2.53 (0.12)       | 0.3365          | 0.9298         | 0.9302          |
| Monocytes (x10 <sup>9</sup> /L)   | 0.56 (0.03)       | 0.61 (0.01)          | 0.58 (0.09)     | 0.62 (0.02)       | 0.9237          | 0.6988         | 0.6766          |
| ESR (mm/hr)                       | 9 (0.88)          | 11.97 (0.9)          | 10 (2)          | 11.4 (1.69)       | 0.8712          | 0.8133         | 0.8555          |
| hs-CRP (mg/L)                     | 3.31 (0.73)       | 6.55 (0.73)          | 14.75 (13.25)   | 8.17 (1.64)       | 0.0320          | 0.2407         | 0.4173          |
| <i><b>Electrolytes</b></i>        |                   |                      |                 |                   |                 |                |                 |
| Sodium (mmol/l)                   | 140.19 (0.22)     | 139.99 (0.14)        | 139.75 (0.25)   | 139.8 (0.36)      | 0.2230          | 0.8378         | 0.9718          |
| Potassium (mmol/l)                | 4.36 (0.04)       | 4.41 (0.03)          | 4.58 (0.11)     | 4.37 (0.05)       | 0.3420          | 0.4468         | 0.2759          |
| Chloride (mmol/l)                 | 102.68 (0.21)     | 101.82 (0.14)        | 101.75 (1.25)   | 102.21 (0.36)     | 0.4446          | 0.9522         | 0.7603          |
| Bicarbonate (mmol/l)              | 28.23 (0.23)      | 28.46 (0.16)         | 26.5 (1.85)     | 27.8 (0.36)       | 0.1969          | 0.1692         | 0.3947          |
| Anion Gap (mmol/l)                | 13.61 (0.23)      | 14.16 (0.17)         | 16.25 (1.18)    | 14.17 (0.41)      | 0.0446          | 0.1547         | 0.2255          |
| <i><b>Metabolic</b></i>           |                   |                      |                 |                   |                 |                |                 |
| Glucose (mmol/l)                  | 5.15 (0.14)       | 4.98 (0.06)          | 4.8 (0.4)       | 5.15 (0.12)       | 0.6657          | 0.7200         | 0.4966          |
| Urea (mmol/l)                     | 4.92 (0.1)        | 4.94 (0.09)          | 4.65 (0.74)     | 4.95 (0.2)        | 0.6271          | 0.6964         | 0.7102          |
| Creatinine (mmol/l)               | 75.86 (1.56)      | 79.46 (0.88)         | 81.75 (4.77)    | 79.12 (1.7)       | 0.5066          | 0.7603         | 0.7096          |
| Urate (mmol/l)                    | 0.3 (0.01)        | 0.3 (0.01)           | 0.27 (0.03)     | 0.3 (0.01)        | 0.4271          | 0.3656         | 0.3819          |

|                                 |                |                |               |                |        |        |        |
|---------------------------------|----------------|----------------|---------------|----------------|--------|--------|--------|
| Total Bilirubin (mmol/l)        | 10.86 (0.63)   | 8.8 (0.35)     | 6.25 (1.7)    | 8.77 (0.79)    | 0.1991 | 0.4005 | 0.4386 |
| Alkaline Phosphatase            | 74.76 (2.86)   | 82.68 (1.7)    | 81 (14.02)    | 77.92 (2.86)   | 0.7006 | 0.9086 | 0.7996 |
| ALT (IU/L)                      | 34.75 (2.54)   | 57.48 (4.38)   | 23.5 (3.2)    | 47.14 (11.82)  | 0.4319 | 0.3659 | 0.6264 |
| AST (IU/L)                      | 28.99 (1.75)   | 43.82 (2.81)   | 24.75 (6.32)  | 32.79 (3.41)   | 0.6684 | 0.4286 | 0.5685 |
| LDH (IU/L)                      | 173.13 (3.46)  | 189.88 (3.05)  | 168.5 (8.18)  | 183.68 (5.64)  | 0.8117 | 0.4137 | 0.5140 |
| GGT (IU/L)                      | 36.11 (6.64)   | 44.16 (3.84)   | 40.25 (18.63) | 27.61 (2.71)   | 0.9121 | 0.9055 | 0.2882 |
| Total Protein (g/dl)            | 73.32 (0.42)   | 74.4 (0.33)    | 75.25 (4.66)  | 74.18 (0.69)   | 0.7074 | 0.7684 | 0.7214 |
| Albumin (g/dl)                  | 43.34 (0.27)   | 42.72 (0.18)   | 43.25 (2.69)  | 43 (0.41)      | 0.9523 | 0.7257 | 0.8873 |
| Globulin (g/dl)                 | 29.98 (0.4)    | 31.69 (0.29)   | 32 (2.48)     | 31.18 (0.64)   | 0.3715 | 0.9014 | 0.7590 |
|                                 |                |                |               |                |        |        |        |
| <b><i>Lipid</i></b>             |                |                |               |                |        |        |        |
| Cholesterol (mmol/l)            | 5.03 (0.09)    | 4.61 (0.06)    | 4.575 (0.37)  | 4.47 (0.12)    | 0.3754 | 0.9465 | 0.8303 |
| Triglycerides (mmol/l)          | 1.45 (0.09)    | 1.41 (0.05)    | 1.825 (0.38)  | 1.35 (0.09)    | 0.4899 | 0.3052 | 0.2216 |
| LDL (mmol/l)                    | 3.11 (0.12)    | 2.57 (0.08)    | 2.02 ()       | 2.51 (0.14)    | 0.2395 | 0.5282 | 0.5706 |
| HDL (mmol/l)                    | 1.26 (0.05)    | 1.22 (0.03)    | 1.77 ()       | 1.12 (0.04)    | 0.1895 | 0.1137 | 0.0090 |
|                                 |                |                |               |                |        |        |        |
| <b><i>Infectious Agents</i></b> |                |                |               |                |        |        |        |
| HBsAg                           | 22 (42%)       | 57 (23%)       | 0 (0%)        | 12 (23%)       | 0.0000 | 0.0000 | 0.0016 |
| HBsAb                           | 281.07 (74.26) | 264.02 (31.82) | 500 (500)     | 313.06 (74.36) | 0.5068 | 0.4157 | 0.5739 |
| HBcAb                           | 7 (14%)        | 68 (28%)       | 0 (0%)        | 9 (16%)        | 0.5008 | 0.0000 | 0.4593 |
| HCVAb                           | 25 (57%)       | 190 (81%)      | 3 (100%)      | 35 (67%)       | 0.0000 | 0.0000 | 0.0000 |
| HIV                             | 0 (0%)         | 0 (0%)         | 0 (0%)        | 0 (0%)         | 0.1372 | 0.7160 | 0.6845 |

**Supplementary Table 7.: Clinical Laboratory Values**

| <b>Parameter</b>      | <b>None (534)</b> | <b>Tobacco (506)</b> | <b>THC (11)</b>  | <b>Both (112)</b> | <b>THC-<br/>None<br/>P</b> | <b>THC-<br/>Tob<br/>P</b> | <b>THC-<br/>Both<br/>P</b> |
|-----------------------|-------------------|----------------------|------------------|-------------------|----------------------------|---------------------------|----------------------------|
| CA                    | 30.47 (0.48)      | 33.33 (0.40)         | 40.36 (2.44)     | 34.56 (0.88)      | 0.0032                     | 0.0100                    | 0.0491                     |
| <i>Operator Index</i> | 88.67 (0.26)      | 88.66 (0.28)         | 91 (2.22)        | 88.76 (0.62)      | 0.2119                     | 0.2181                    | 0.2882                     |
| <i>Timing</i>         |                   |                      |                  |                   |                            |                           |                            |
| HR                    | 69.6 (0.5)        | 70.28 (0.53)         | 64 (2.34)        | 68.49 (1.06)      | 0.1088                     | 0.0836                    | 0.1983                     |
| ED                    | 324.67 (0.9)      | 322.29 (0.94)        | 333.45 (4.31)    | 323.89 (1.9)      | 0.1656                     | 0.0827                    | 0.1264                     |
| CalcED                | 324.67 (0.9)      | 322.29 (0.94)        | 333.45 (4.31)    | 323.89 (1.9)      | 0.1656                     | 0.0827                    | 0.1264                     |
| C_SVI                 | 143.8 (1.3)       | 142.79 (1.3)         | 152.45 (6.93)    | 146.16 (2.82)     | 0.3430                     | 0.2782                    | 0.4982                     |
| C_TTI                 | 2166.13 (16.69)   | 2176.83 (17.65)      | 2130.45 (132.93) | 2102.48 (32.27)   | 0.7622                     | 0.7023                    | 0.8012                     |
| C_DTI                 | 3019.64 (17.81)   | 3014.41 (17.55)      | 3197.82 (200.36) | 2995.42 (40.85)   | 0.3962                     | 0.3830                    | 0.1626                     |
| C_PERIOD              | 887.53 (6.34)     | 880.42 (6.72)        | 950.45 (32.67)   | 902.04 (14.1)     | 0.1574                     | 0.1275                    | 0.2972                     |
| C_DD                  | 562.93 (5.78)     | 558.17 (6.09)        | 617.18 (30.43)   | 578.22 (12.93)    | 0.1809                     | 0.1559                    | 0.3603                     |
| C_ED_PERIOD           | 37.43 (0.21)      | 37.46 (0.21)         | 35.64 (1.17)     | 36.78 (0.46)      | 0.2222                     | 0.2100                    | 0.4491                     |
| C_DD_PERIOD           | 62.73 (0.21)      | 62.73 (0.21)         | 64.55 (1.19)     | 63.37 (0.46)      | 0.2192                     | 0.2132                    | 0.4352                     |
| <i>Pressure</i>       |                   |                      |                  |                   |                            |                           |                            |
| SP                    | 123.53 (0.53)     | 123.42 (0.56)        | 122.91 (4.98)    | 122.09 (1.14)     | 0.8682                     | 0.8946                    | 0.8358                     |
| DP                    | 68.96 (0.41)      | 68.22 (0.44)         | 69.45 (4.63)     | 66.27 (0.91)      | 0.9181                     | 0.6892                    | 0.3249                     |
| P_MEANP               | 86.53 (0.44)      | 86.59 (0.46)         | 88.82 (5.13)     | 85.1 (0.9)        | 0.6659                     | 0.6748                    | 0.4902                     |
| C_SP                  | 105.42 (0.51)     | 106.05 (0.51)        | 111 (6.19)       | 105.56 (0.96)     | 0.3899                     | 0.4434                    | 0.4047                     |
| C_DP                  | 70.31 (0.42)      | 69.82 (0.45)         | 70.82 (4.68)     | 67.5 (0.93)       | 0.8653                     | 0.7482                    | 0.3172                     |
| C_ESP                 | 93.1 (0.52)       | 93.67 (0.51)         | 98.82 (5.99)     | 93.23 (1.03)      | 0.3633                     | 0.4113                    | 0.3782                     |
| C_MPS                 | 96.57 (0.45)      | 96.81 (0.46)         | 100.09 (5.5)     | 95.73 (0.89)      | 0.5381                     | 0.5660                    | 0.4516                     |
| C_MPD                 | 80.51 (0.42)      | 80.5 (0.45)          | 82.45 (5)        | 78.9 (0.92)       | 0.7067                     | 0.7058                    | 0.4998                     |
| C_MEANP               | 86.53 (0.44)      | 86.59 (0.46)         | 88.82 (5.13)     | 85.1 (0.9)        | 0.6656                     | 0.6748                    | 0.4902                     |

**Supplementary Table 8.:**

**Linear Regression Table of Comparative Cannabis and Opioid Exposure**

| Parameter Values                                             |         |           |    |         |        | Model   |         |          |
|--------------------------------------------------------------|---------|-----------|----|---------|--------|---------|---------|----------|
| Statistical Measure                                          | Value   | Std.Error | DF | t-value | P      | AIC     | BIC     | Log.Lik  |
| Cannabis.Duration                                            | -2.1785 | 0.6936    | 20 | -3.1409 | 0.0051 | 59.1548 | 71.1268 | -21.5774 |
| Cannabis.Use: Cannabis.Duration                              | 0.5565  | 0.1847    | 13 | 3.0126  | 0.0100 |         |         |          |
| Cannabis.Use                                                 | -1.6725 | 0.5581    | 13 | -2.997  | 0.0103 |         |         |          |
| Opioid.Use: Opioid Duration: Cannabis.Duration               | 0.0375  | 0.0141    | 13 | 2.6715  | 0.0192 |         |         |          |
| Opioid.Use: Opioid Duration: Cannabis.Use: Cannabis.Duration | -0.0100 | 0.0041    | 13 | -2.4135 | 0.0313 |         |         |          |

# Supplementary Figure 1

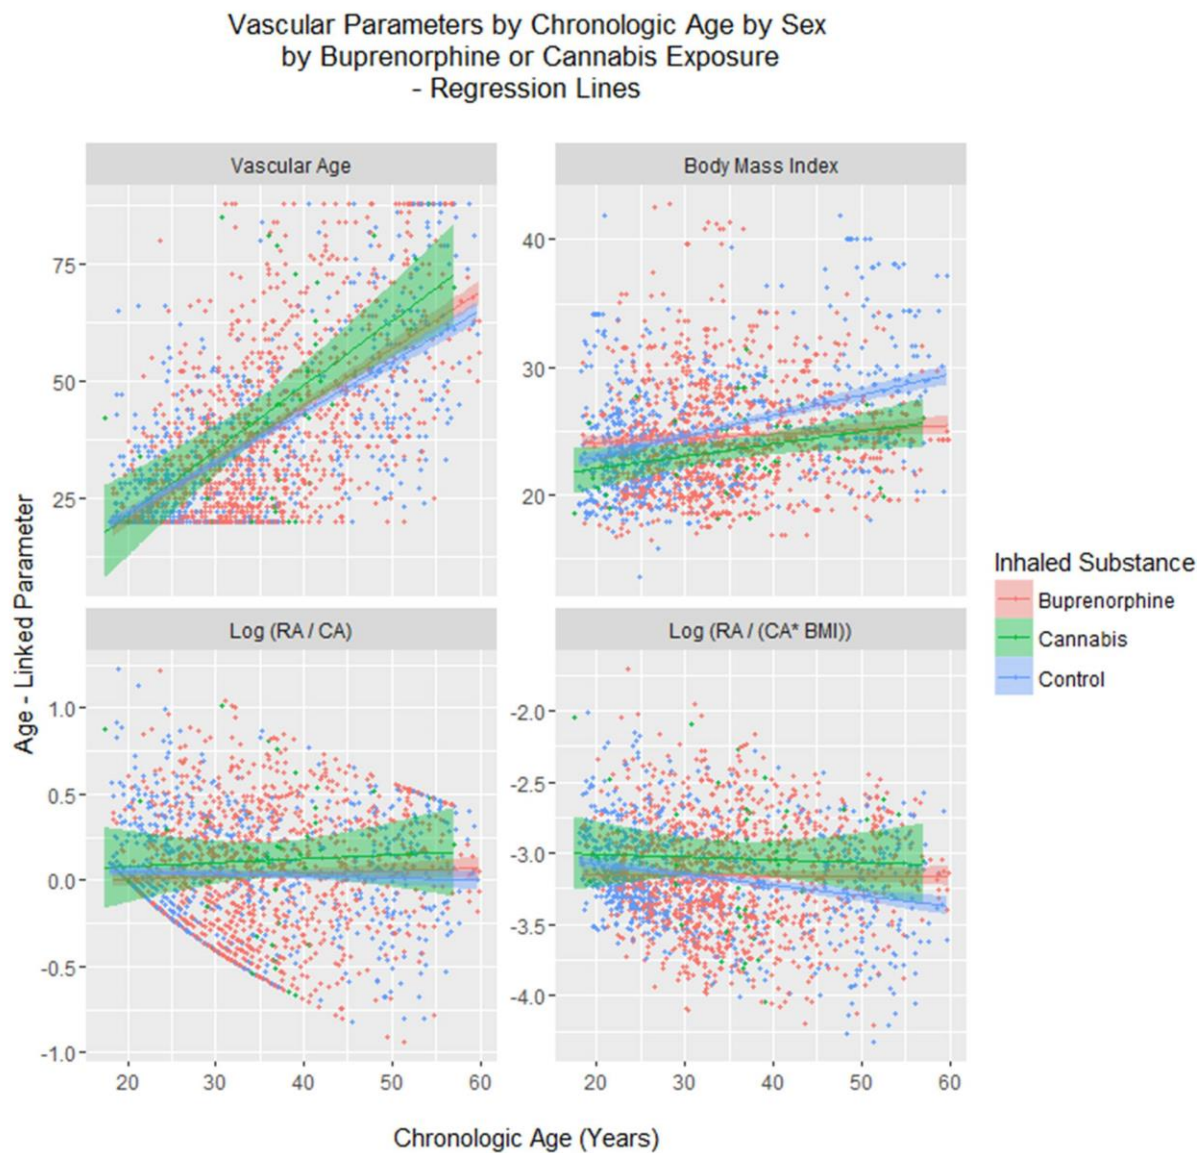

Abbreviations as in Figure 2

# Supplementary Figure 2

Vascular Parameters by Chronologic Age by Sex  
by Tobacco and / or Cannabis Exposure  
- Regression Lines

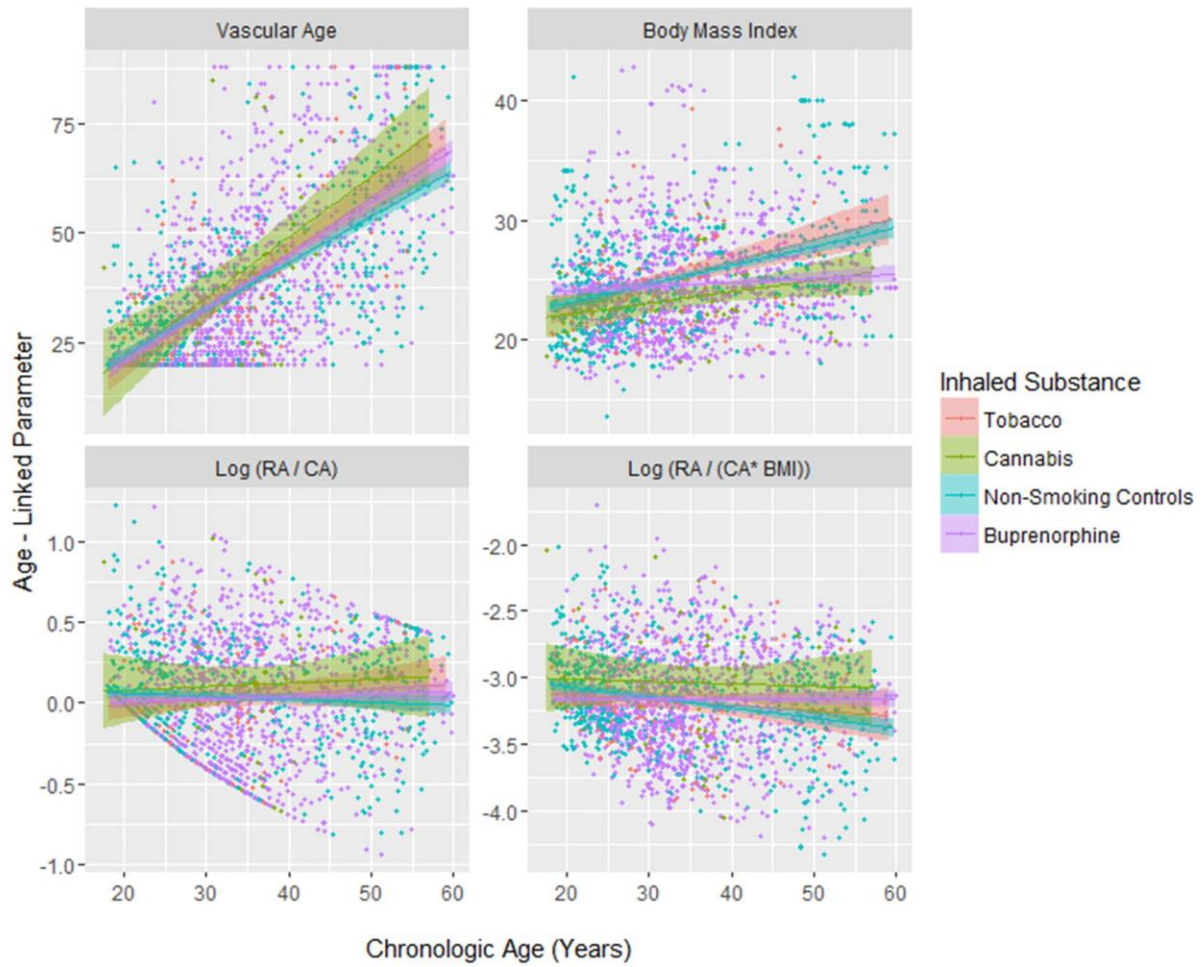

Abbreviations as in Figure 2

# Supplementary Figure 3

Vascular Parameters by Chronologic Age by Sex  
by Tobacco, Cannabis and Buprenorphine Exposure  
- Regression Lines

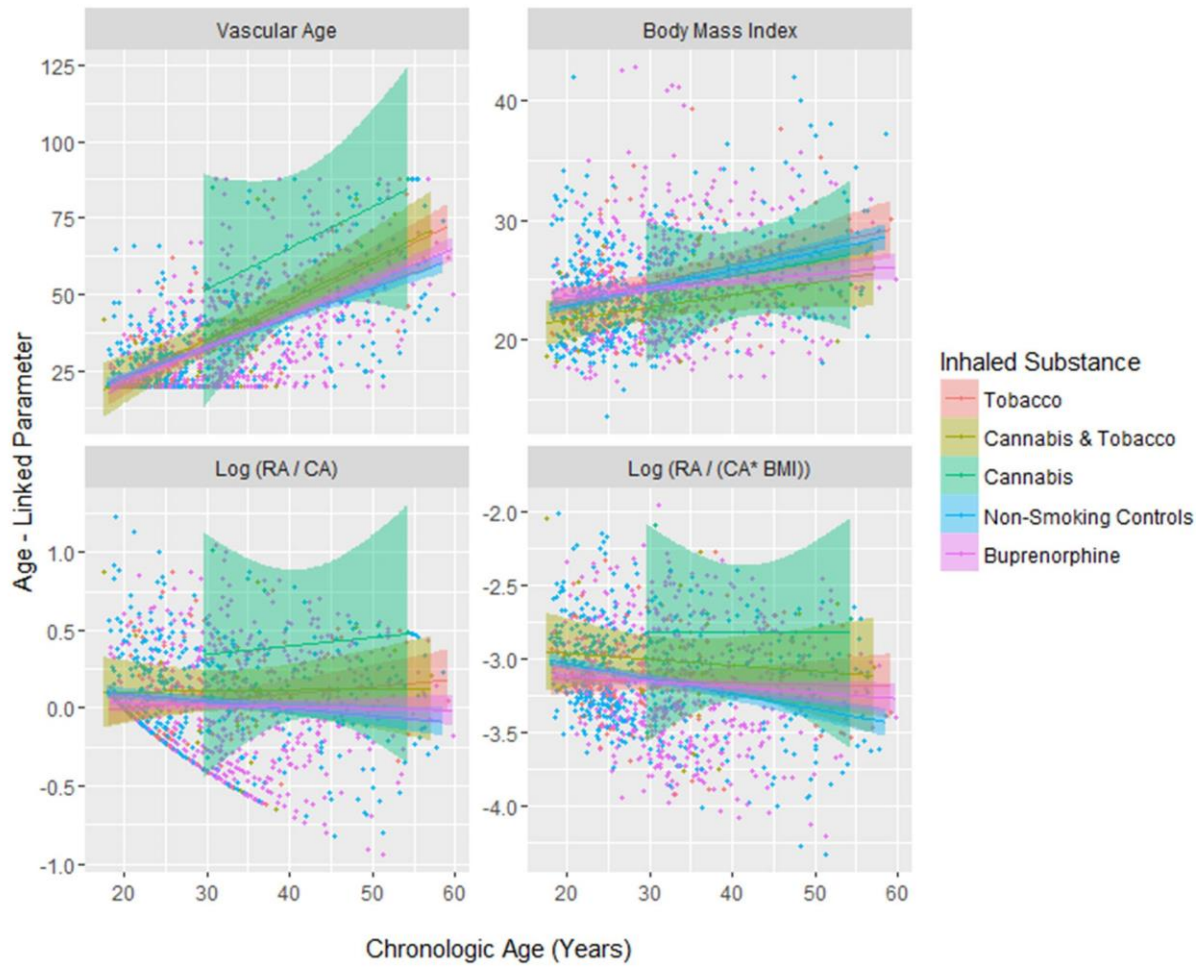

Abbreviations as in Figure 2

# Supplementary Figure 4

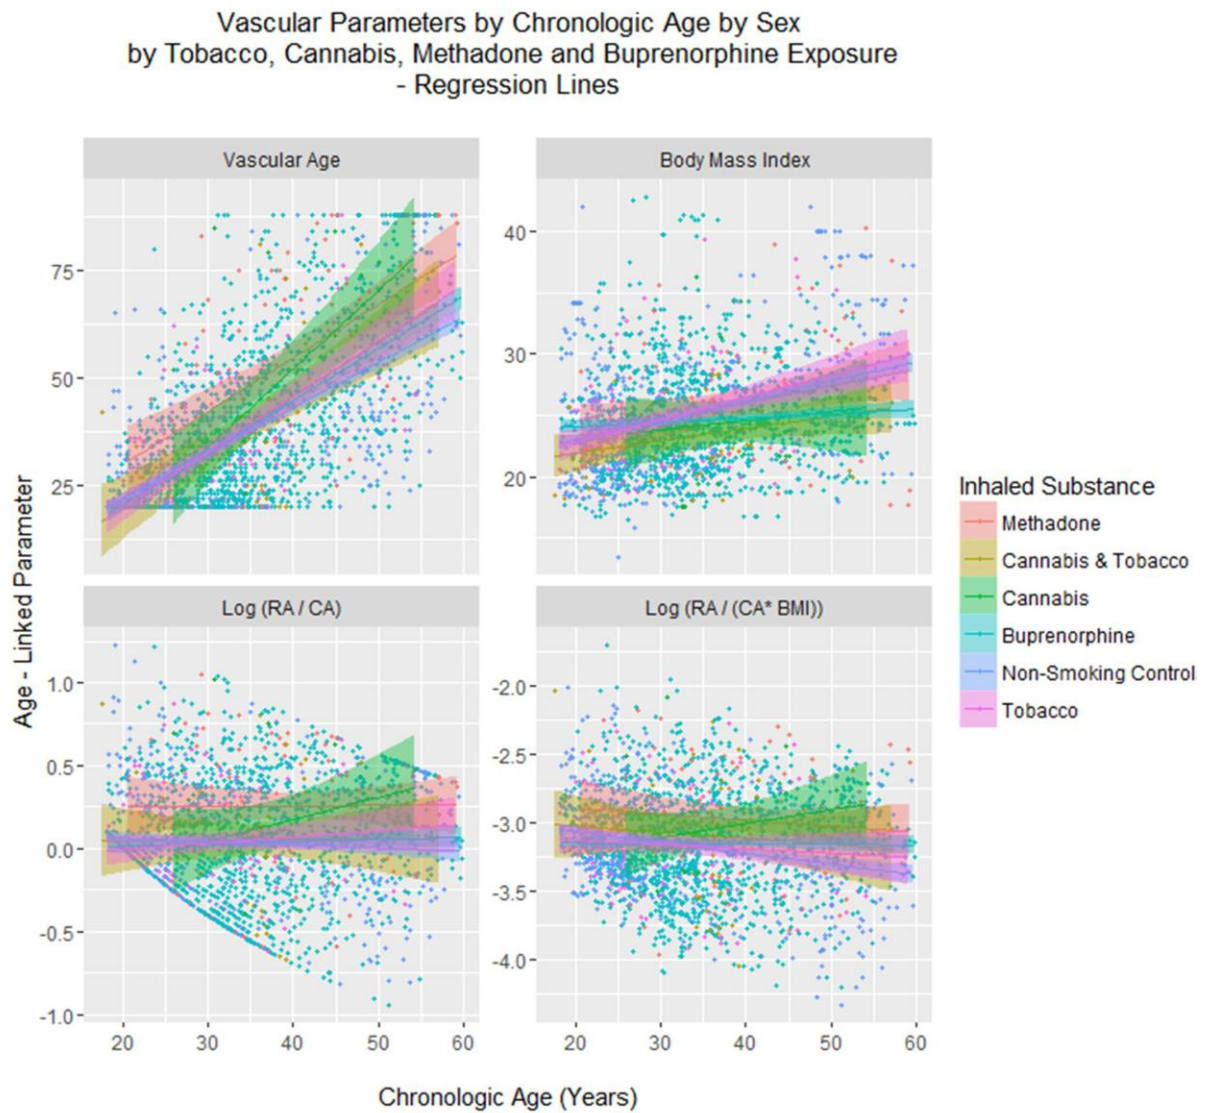

Abbreviations as in Figure 2



# Supplementary Figure 5

Vascular Parameters by Time  
by Tobacco and / or Cannabis Exposure  
- Regression Lines

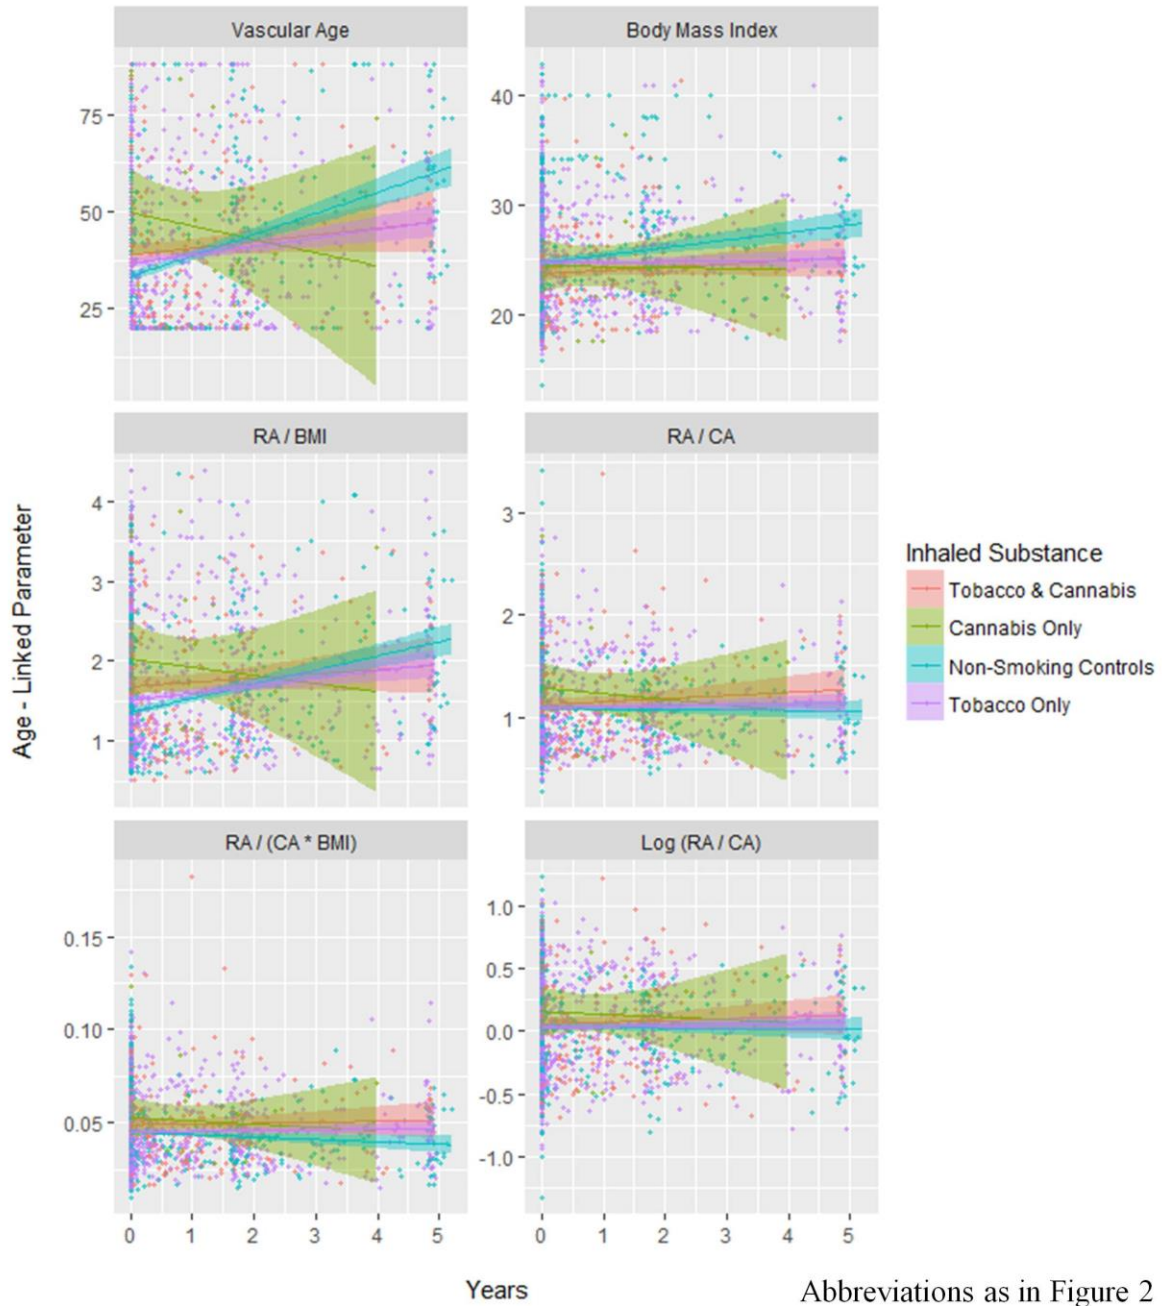

# Supplementary Figure 6

Vascular Parameters by Chronologic Age  
by Tobacco and / or Cannabis Exposure  
- Loess Curves

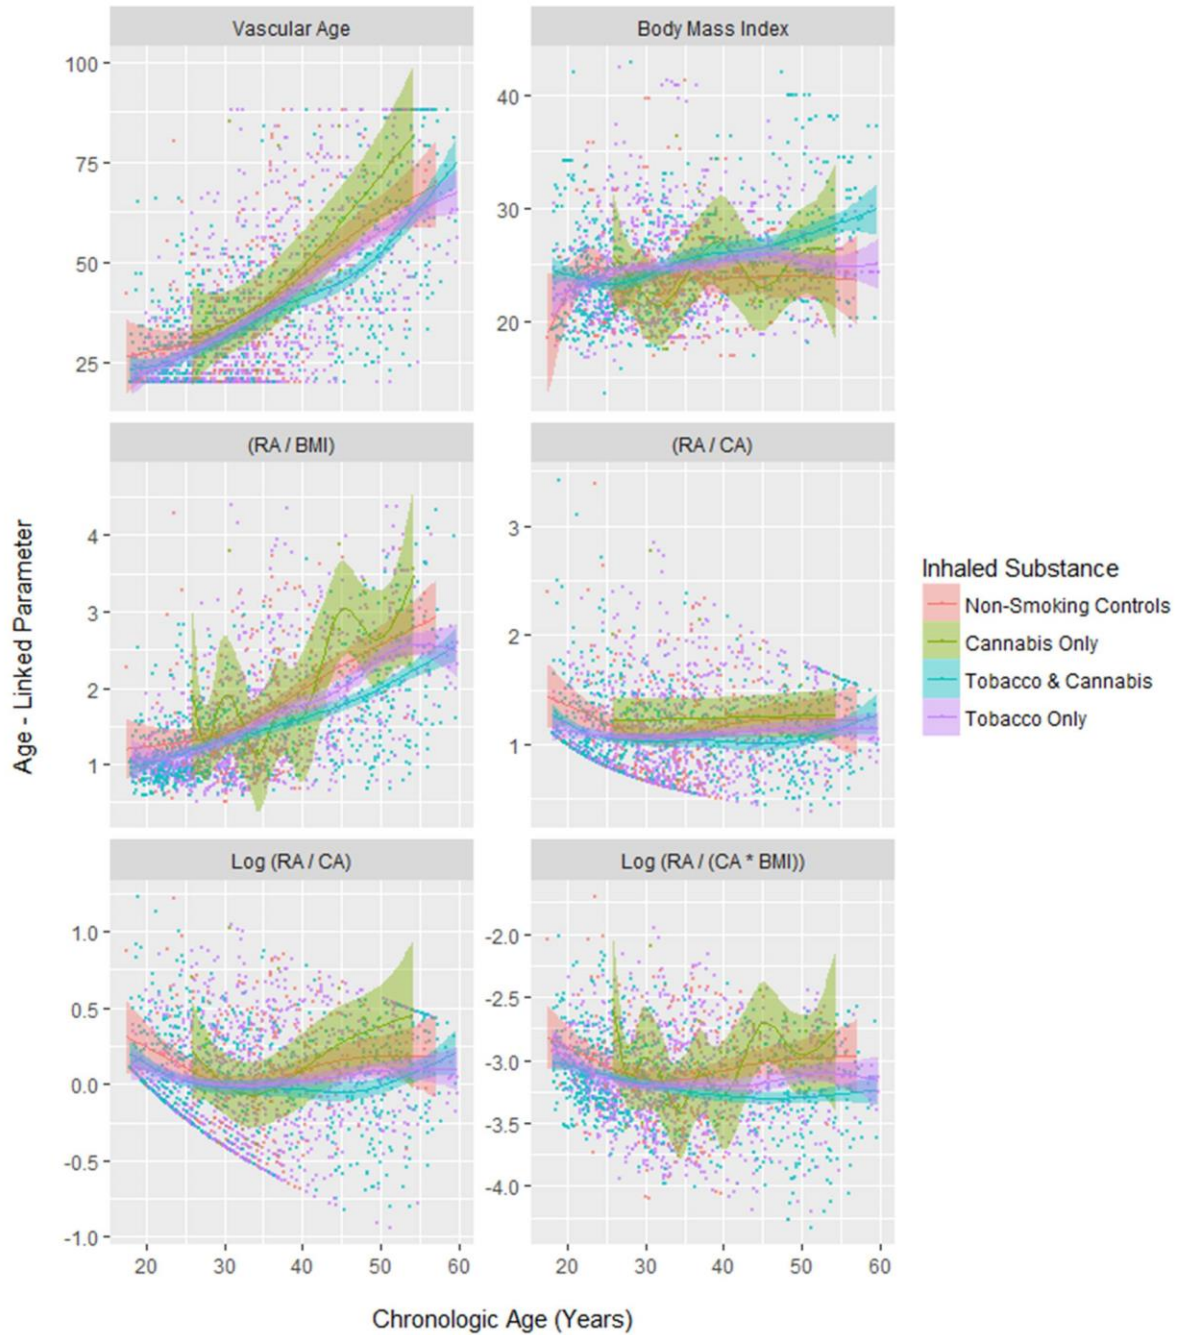

# Supplementary Figure 7

Vascular Parameters by Time  
by Tobacco and / or Cannabis Exposure  
- Loess Curves

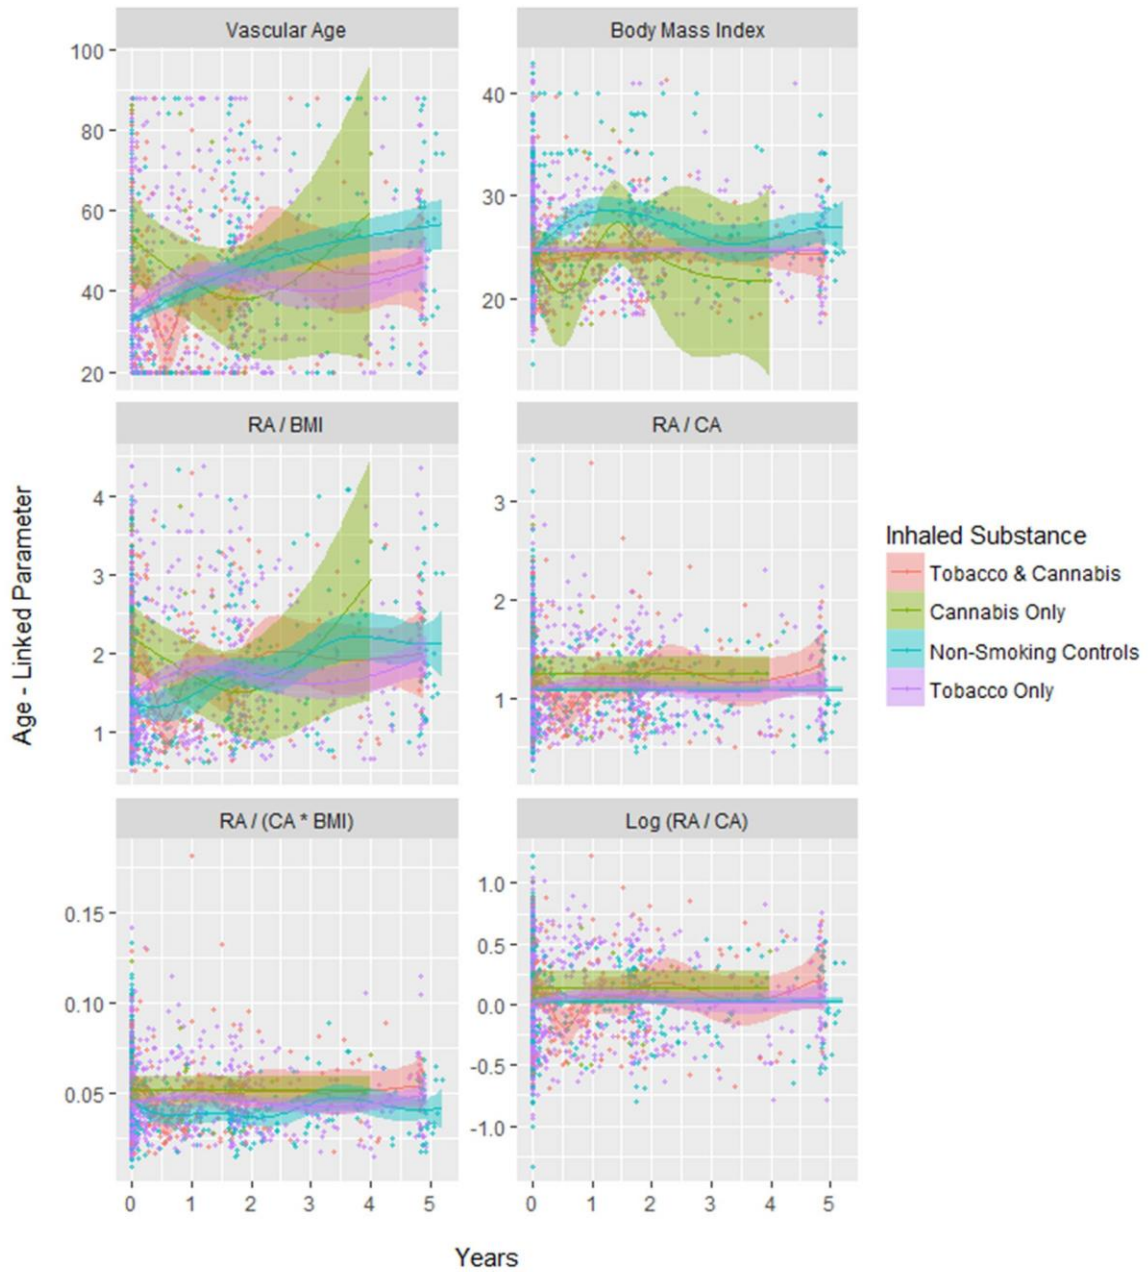

# Comments on Supplementary Figure 7

Abbreviations as in Figure 2

Loess curves = LOcally WEighted Scatterplot Smoother

# Supplementary Figure 8

Vascular Parameters by Chronologic Age by Sex  
by Tobacco and / or Cannabis Exposure  
- Regression Lines

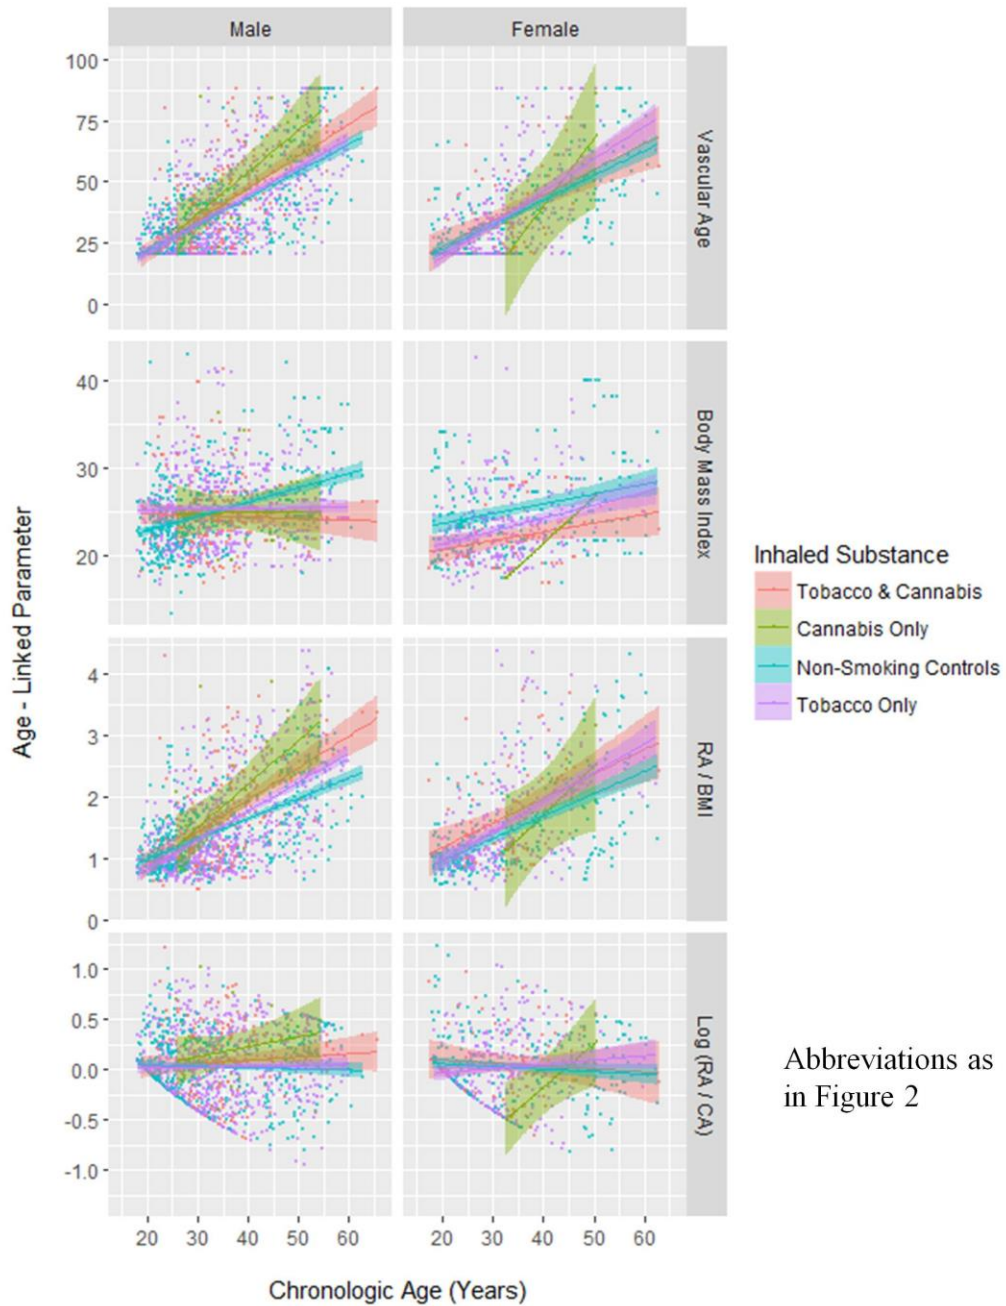

# Supplementary Figure 9

Vascular Parameters by Time by Sex  
by Tobacco and / or Cannabis Exposure  
- Regression Lines

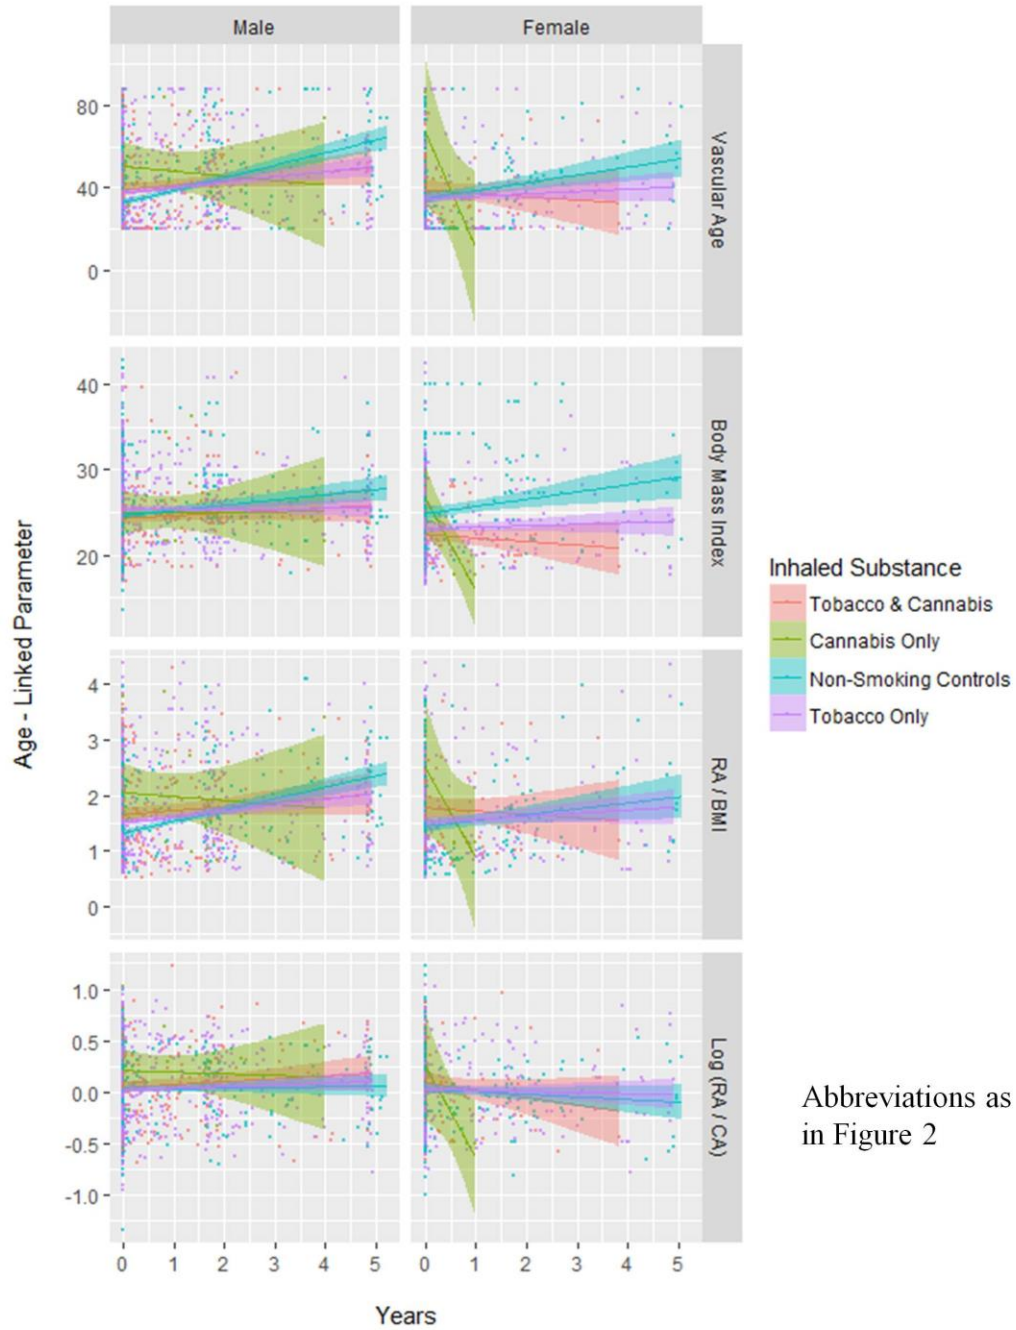

# Supplementary Figure 10

Cardiovascular Parameters in First Four Hours After Cannabis Exposure  
by Tobacco and / or Cannabis Exposure  
- Logarithmic Smoothers

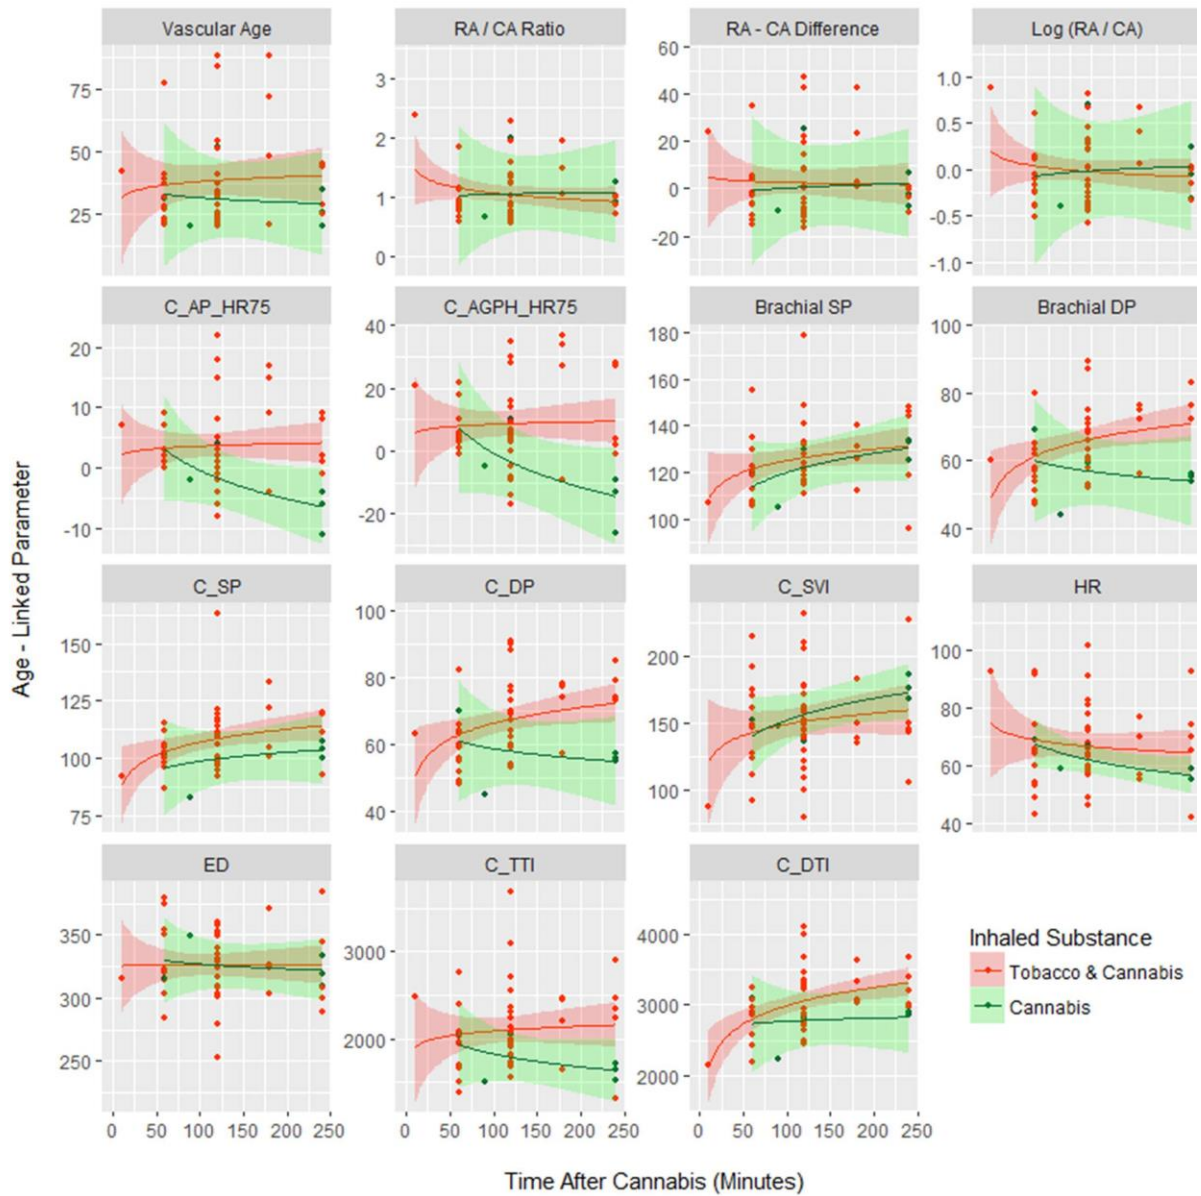

# Supplementary Figure 11

Log (RA / (CA\*BMI)) by Chronologic Age by Sex  
by Tobacco and / or Cannabis Exposure  
- Regression Lines

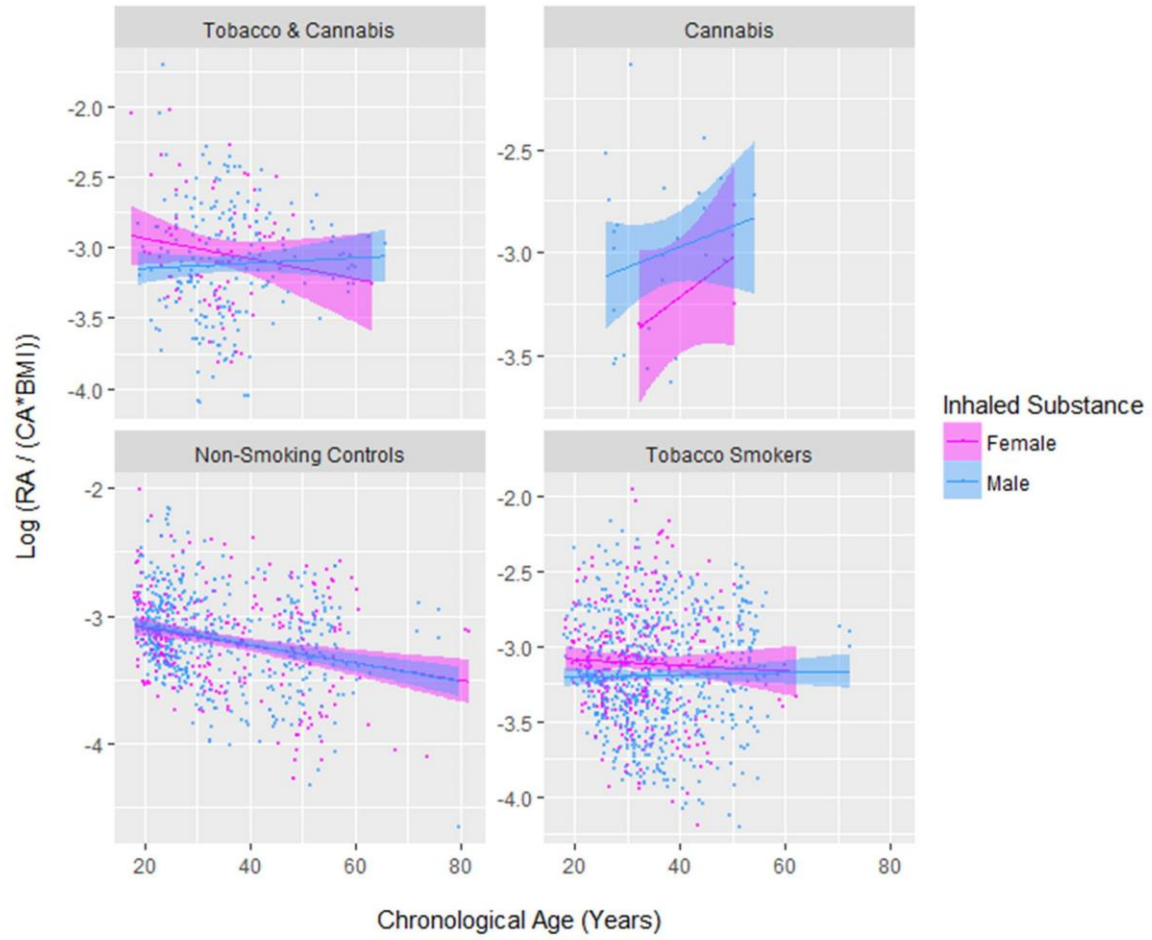



# Supplementary Figure 12

Log (RA / (CA\*BMI)) by Time by Sex  
by Tobacco and / or Cannabis Exposure  
- Regression Lines

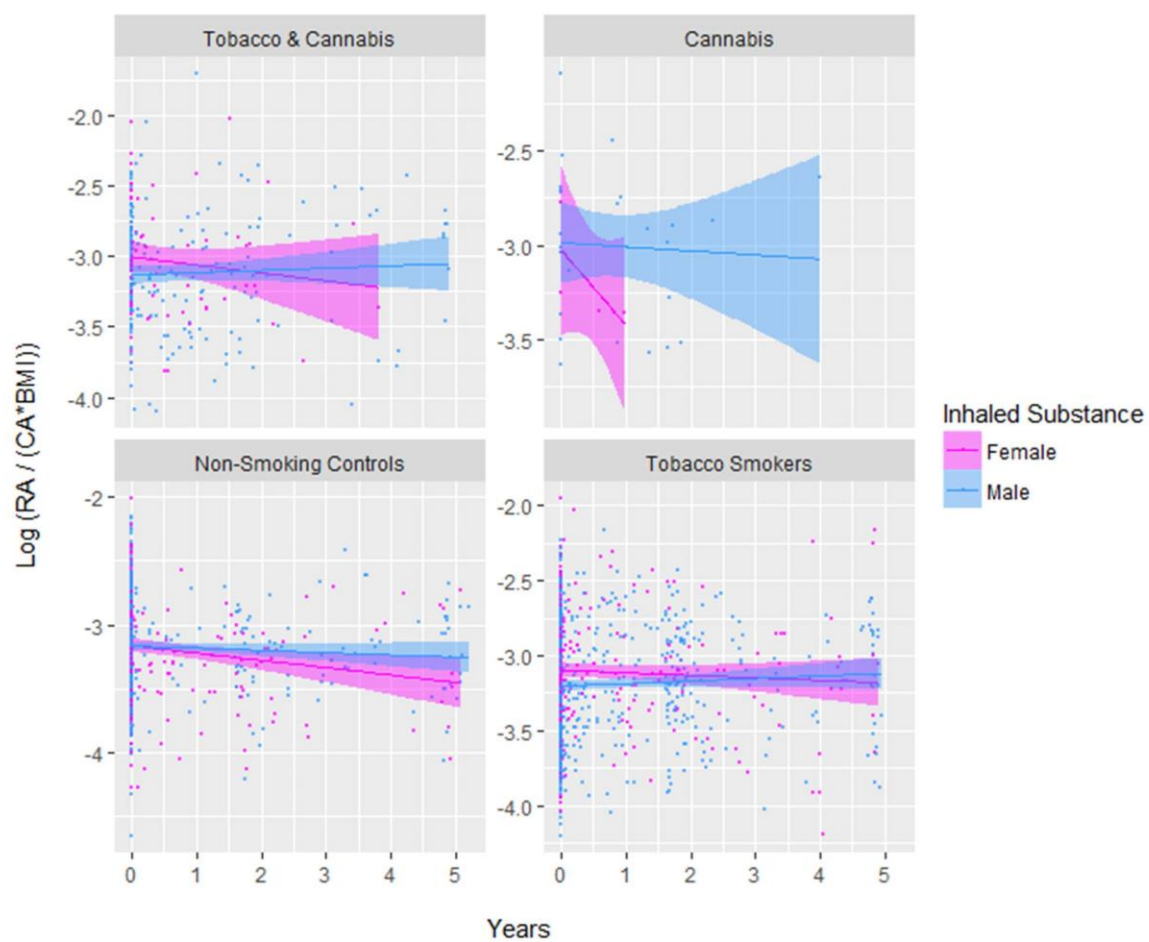

Supplement: bmjopen-2016-011891supp.pdf [file bmjopen-2016-011891supp.pdf]
